# Supplementary material
Source: Springer Nature journal article supplement (https://www.springermedizin.de/resource/supplementary/12884_2013_999_MOESM1_ESM.pdf/9458728)
Supplement: MOESM1 [file 9458728]

100% of the records meeting the inclusion

YES

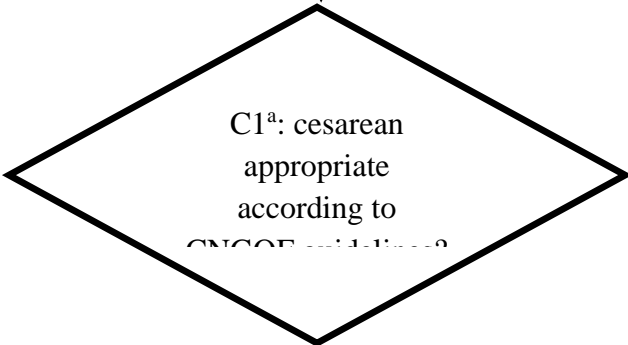

YES

C2<sup>b</sup>: 52.1% cesareans were appropriate (n=100/192)

NO

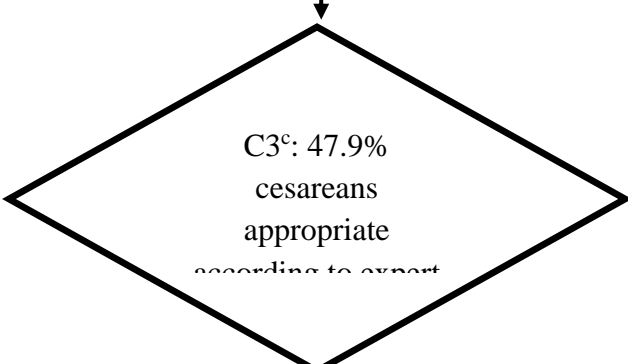

YES

C2<sup>b</sup>: 28.3% cesareans were appropriate (n= 26/92)

NO

C4<sup>d</sup>: 71.7% cesareans were not appropriate (n=66)

WHY?

C5<sup>e</sup>: 34.8% cesareans for maternal convenience (n=23/66)

C6<sup>f</sup>: 65.2% of cesareans planned for provider preference (n=43/66)

Overall rate of appropriate cesareans = 65.6% (n= 126/192)

Overall rate of inappropriate cesareans = 34.4% (n= 66/192)

including 12.0% for maternal convenience (n=23/192) and 22.4% for provider preference (n= 43/192)
